# Supplementary material
Source: PubMed Central journal article supplement (PMC2430754)

Effect modification by community characteristics on the short-term effects of ozone exposure and mortality in 98 U.S. communities.  
*American Journal of Epidemiology* (Bell and Dominici)

**WEB FIGURE 1**

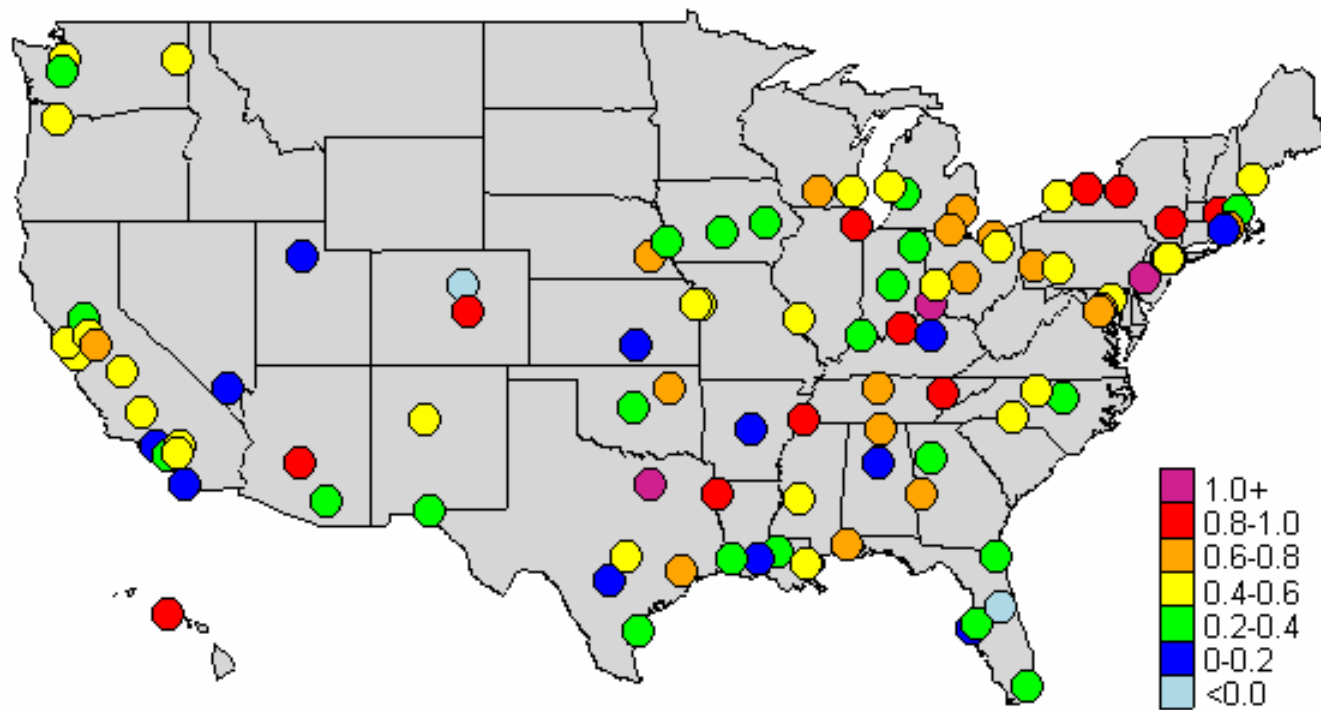

Supplement: NIHMS50325-supplement-Supplemental.pdf [file NIHMS50325-supplement-Supplemental.pdf]
